# Supplementary material for: Epidemiology and burden of influenza in healthy children aged 6 to 35 months: analysis of data from the placebo arm of a phase III efficacy trial
Source: Springer Nature journal article supplement (doi:10.1186/s12879-019-3920-8), 2019-04-04

**Supplementary Figure 1: Participant flow diagram for the original study**

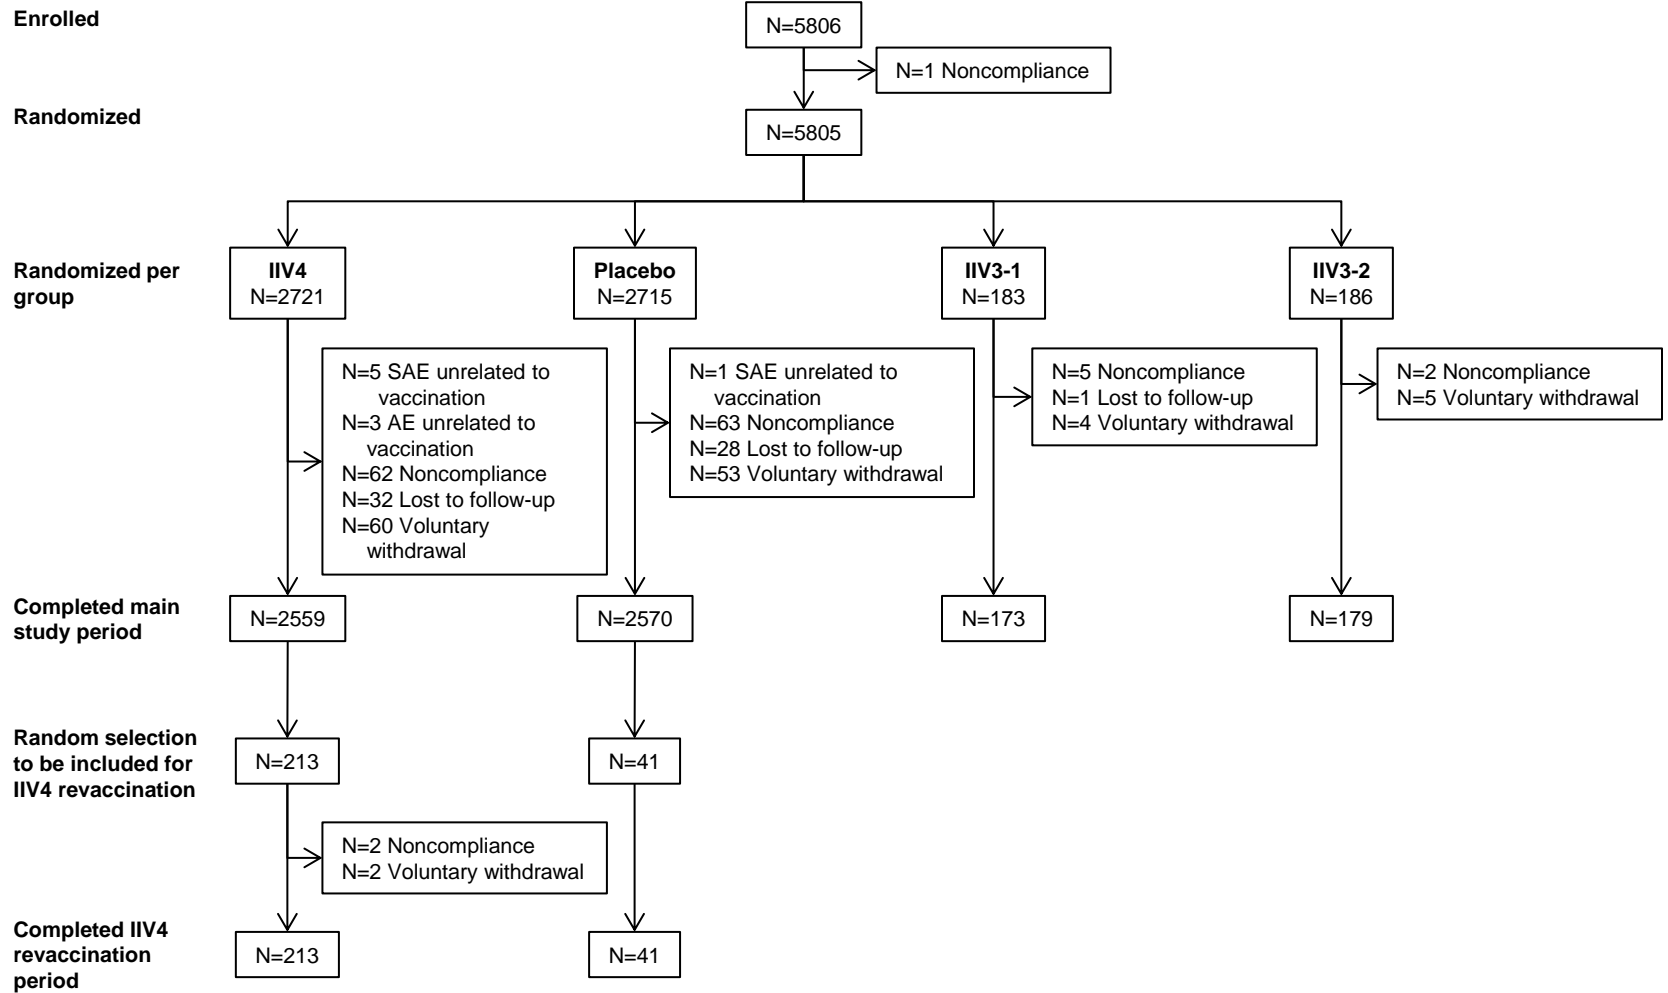

Supplement: MOESM1 [file 16609764]
