# Supplementary material for: Epidemiology and burden of influenza in healthy children aged 6 to 35 months: analysis of data from the placebo arm of a phase III efficacy trial
Source: Springer Nature journal article supplement (doi:10.1186/s12879-019-3920-8), 2019-04-04
Supplement: MOESM2 [file 16609764]

**Supplementary Table 1. Medication use associated with confirmed influenza episodes by region**

| <b>Laboratory-confirmed influenza associated with:</b> | <b>South Africa<br/>N=17</b> | <b>Philippines<br/>N=138</b> | <b>European countries<sup>a</sup><br/>N=108</b> |
|--------------------------------------------------------|------------------------------|------------------------------|-------------------------------------------------|
| Any medication                                         | 16 (94.1)                    | 137 (99.3)                   | 104 (96.3)                                      |
| Antibiotics                                            | 4 (23.5)                     | 63 (45.7)                    | 42 (38.9)                                       |
| Pain medication <sup>b</sup>                           | 16 (94.1)                    | 130 (94.2)                   | 99 (91.7)                                       |
| Antitussives                                           | 2 (11.8)                     | 1 (0.72)                     | 5 (4.6)                                         |
| Bronchodilators                                        | 1 (5.9)                      | 24 (17.4)                    | 11 (10.2)                                       |
| Expectorants                                           | 0 (0.0)                      | 6 (4.3)                      | 4 (3.7)                                         |
| Mucolytic agents                                       | 5 (29.4)                     | 36 (26.1)                    | 6 (5.6)                                         |

<sup>a</sup> France, Greece, Italy, Spain, and Romania

<sup>b</sup> Antipyretics, analgesics, non-steroidal anti-inflammatory drugs
